# Supplementary material for: Ecological Assessment of Two Species of Potamonautid Freshwater Crabs from the Eastern Highlands of Zimbabwe, with Implications for Their Conservation
Source: PLoS One. 2016 Jan 11;11(1):e0145923. doi: 10.1371/journal.pone.0145923 (PMC4713832; doi:10.1371/journal.pone.0145923)
Supplement: S2 Table — (XLSX) [file pone.0145923.s002.xlsx]

## Sheet: Distrubition
Site name	Region	Crab	Coordinates		Crab numbers
			SOUTH	EAST
Mare River 1	North	Potamonautes unispinus	18°17.224'	032°43.168'	8
Nyangombe River 1	North	Potamonautes mutareensis	18°16.870'	032°43.441'	9
Nyangombe River 2	North	P. unispinus	18°15.324'	032°46.203'	5
Nyangombe River 3	North	P. unispinus	18°15.283'	032°46.119'	24
Nyanora River 1	North	P. unispinus	18°16.706'	032°43.372'	12
Nyangombe River 4	North	P. unispinus	18°17.161'	032°40.764'	37
Udu River 1	North	P. unispinus	18°16.987'	032°41.623'	14
Udu River 2	North	P. unispinus	18°16.407'	032°42.117'	9
Nyamuzhiwa River 1	North	P. mutareensis	18°16.889'	032°49.674'	48
Nyamuzhiwa River 2	North	P. mutareensis	18°16.473'	032°49.350'	29
Nyamuzhiwa River 3	North	P. mutareensis	18°15.208'	032°47.510'	12
Nyamonhombo River 1	North	P. mutareensis	18°16.881'	032°46.278'	22
Mare River 2	North	P. mutareensis	18°17.855'	032°46.139'	34
Mare River 3	North	P. mutareensis	18°17.401'	032°44.609'	13
Maroro River	North	P. mutareensis	18°17.485'	032°43.085'	26
Nyanora River 2	North	P. unispinus	18°15.705'	032°43.601'	15
Nyarerwe River 1	North	P. mutareensis	18°12.957'	032°45.867'	10
Nyarerwe River 2	North	P. mutareensis	18°13.011'	032°45.871'	9
Nyarerwe River 3	North	P. mutareensis	18°13.273'	032°45.434'	11
Nyanora River 3	North	P. unispinus	18°14.817'	032°45.669'	27
Pine Tree Inn	North	P. mutareensis	18°22.116'	032°38.477'	19
Nyanga Road 4	North	P. unispinus	18°24.337'	032°38.846'	13
Nyanga Road 5	North	P. unispinus	18°29.702'	032°37.271'	18
Nyangombe River 5	North	P. unispinus	18°15.973'	032°38.825'	51
Nyanga Road River 1	North	P. unispinus	18°29.670'	032°37.386'	8
Nyanga Road River 2	North	P. unispinus	18°31.816'	032°38.658'	16
Nyanga Road River 3	North	P. unispinus	18°31.647'	032°40.379'	14
Penhalonga River 1	Central	P. mutareensis	18°24.773'	032°40.739'	34
Penhalonga River 2	Central	P. mutareensis	18°43.564'	032°35.846'	8
Penhalonga River 3	Central	P. mutareensis	18°53.333'	032°39.479'	39
Masvingo Road River 1	Central	P. unispinus	18°49.962'	032°41.225'	11
Masvingo Road River 2	Central	P. unispinus	19°30.050'	032°31.526'	12
Masvingo Road River 3	Central	P. unispinus	19°19.143'	032°34.392'	35
Umvumvumvu River 1	Central	P. unispinus	19°32.401'	032°31.107'	20
Umvumvumvu River 2	Central	P. unispinus	19°31.552'	032°36.462'	11
Umvumvumvu River 3	Central	P. unispinus	19°32.723'	032°39.446'	34
Umvumvumvu River 4	Central	P. mutareensis	19°32.731'	032°47.488'	10
Umvumvumvu River T	Central	P. mutareensis	19°32.119'	032°44.510'	14
Chimanimani Road River 1	Central	P. unispinus	19°36.396'	032°38.856'	12
Chimanimani Road River 2	Central	P. mutareensis	19°41.948'	032°38.159'	9
Chimanimani Road River 3	Central	P. mutareensis	19°43.581'	032°38.159'	14
Chimanimani Road River 4	Central	P. mutareensis	19°47.584'	032°41.359'	10
Bridal Veil Falls River 1	Central	P. mutareensis	19°47.455'	032°50.918'	13
Nyahode River 1	Central	P. mutareensis	19°47.524'	032°50.850'	9
Nyahode River 2	Central	P. mutareensis	19°47.827'	032°50.443'	7
Musapa River 1	Central	P. unispinus	19°42.910'	032°55.746'	58
Muowa River 1	Central	P. mutareensis	19°42.041'	032°57.614'	32
Muowa Falls	Central	P. mutareensis	19°41.962'	032°57.797'	41
Muowa River 2	Central	P. mutareensis	19°42.179'	032°57.684'	14
Muowa River 3	Central	P. mutareensis	19°41.675'	032°57.301'	47
Muowa River 4	Central	P. mutareensis	19°41.579'	032°57.393'	9
Bindu Falls	Central	P. mutareensis	19°46.072'	033°01.263'	36
Skeleton Pass River 1	Central	P. mutareensis	19°45.937'	033°01.869'	34
Bindu River 1	Central	P. mutareensis	19°46.448'	033°01.506'	50
Bindu River 2	Central	P. mutareensis	19°46.794'	033°01.662'	30
Hadangi River 1	Central	P. mutareensis	19°45.920'	033°00.391'	35
Hadangi River 2	Central	P. mutareensis	19°46.070'	033°00.277'	23
Hadangi River 3	Central	P. mutareensis	19°46.099'	033°00.020'	12
Hadangi River 4	Central	P. mutareensis	19°46.400'	032°59.067'	41
Mutekesane River	Central	P. mutareensis	19°46.406'	032°59.063'	11
Hadangi River 5	Central	P. mutareensis	19°46.398'	032°59.039'	28
Tanganda River 1	South	P. unispinus	20°05.175'	032°34.850	16
Tanganda River 2	South	P. unispinus	20°05.726'	032°34.654'	14
Tanganda River 3	South	P. unispinus	20°05.739'	032°34.677'	23
Nyarinhombo River 1	South	P. unispinus	20°06.210'	032°34.727'	9
Nyarinhombo River 2	South	P. unispinus	20°06.193'	032°34.556'	6
Mvurachena River	South	P. unispinus	20°09.134'	032°47.534'	19
Chipita River 1	South	P. unispinus	20°08.987'	032°47.548'	32
Chipita River 2	South	P. unispinus	20°09.540'	032°46.670'	37
Chipudzana River 1	South	P. unispinus	20°13.489'	032°49.311'	25
Chimudididza River 1	South	P. unispinus	20°12.734'	032°50.379'	13
Chimudididza River 2	South	P. unispinus	20°13.827'	032°49.877'	28
Chipudzana River 2	South	P. unispinus	20°14.563'	032°49.707'	26
Chitora River 2	South	P. unispinus	20°14.663'	032°48.547'	25
Chitora River 1	South	P. unispinus	20°14.428'	032°48.401'	8
Manyoka River 1	South	P. unispinus	20°25.884'	032°43.526'	21
Zona River 1	South	P. mutareensis	20°25.552'	032°43.802'	22
Zona River 2	South	P. mutareensis	20°26.098'	032°44.089'	51
Manyoka River 2	South	P. mutareensis	20°26.120'	032°44.082'	53
Nyaudongo River 2	South	P. unispinus	20°25.653'	032°44.978	23
Nyaudongo River 3	South	P. unispinus	20°26.144'	032°44.347'	9
Zona River 3	South	P. unispinus	20°26.834'	032°44.404'	20
Nyamukanga River 1	South	P. unispinus	20°32.037'	032°40.310'	53
Nyamukanga River 2	South	P. unispinus	20°31.511'	032°41.318'	18
Nyamukanga River 3	South	P. unispinus	20°31.627'	032°38.123'	24
Nyamukanga River 4	South	P. unispinus	20°32.321'	032°39.718'	41
Chinyika River 2	South	P. unispinus	20°32.526'	032°40.585'	10
Chinyika River 1	South	P. unispinus	20°32.254'	032°40.762'	14
Fayixanda River	South	P. mutareensis	20°31.356'	032°40.844'	17
Chinyika River 3	South	P. unispinus	20°30.265'	032°41.215'	13
Nyamakashu River	South	P. unispinus	20°30.266'	032°41.229'	25
Unknown River 1	Central	P. mutareensis	18°32.658'	032°48.236'	21
Unknown River 2	Central	P. mutareensis	18°32.550'	032°45.849'	23
Unknown River 3	Central	P. mutareensis	18°31.926'	032°48.501'	17
Unknown River 4	North	P. mutareensis	18°29.438'	032°51.946'	9
Unknown River 5	North	P. mutareensis	18°30.849'	032°50.023'	14
Chidiya River	North	P. mutareensis	18°22'07.5"S	32°38'025.8"E	42
Penhalonga River	Central	P. mutareensis	18°49'052.6"S	32°41'014.8"E	32
Umvumvumvu River	Central	P. mutareensis	18°21'09.9"S,	32°31'053.6"E	29
Chimanimani River	Central	P. mutareensis	18°18'051.3"S	32°30'054.9"E	34
Sakubva River 1	Central	P. unispinus	18°15.715'	032°40.963'	45
Sakubva River 2	Central	P. unispinus	18°15.718'	032°40.122'	61
Sakubva River 3	Central	P. unispinus	18°59.583'	032°37.339'	80
Sakubva River 4	Central	P. unispinus	18°59.474'	032°37.339'	56
